# Supplementary material
Source: MDPI journal article supplement (https://www.mdpi.com/2073-4441/12/3/690)

Article

## *Supplementary Materials for*

# **A new mass-conservative, two-dimensional, semi-implicit numerical scheme for the solution of the Navier-Stokes equations in gravel bed rivers with erodible fine sediments**

**Maurizio Tavelli <sup>1,\*†</sup>, Sebastiano Piccolroaz <sup>2,†</sup>, Giulia Stradiotti <sup>3,†</sup>, Giuseppe Roberto Pisaturo <sup>4</sup>, Maurizio Righetti<sup>5</sup>**

Faculty of Science and Technology, Free University of Bozen-Bolzano, Universitätsplatz - Piazza Università 5, Bozen-Bolzano, 39100, Italy

<sup>1</sup> mtavelli@unibz.it

<sup>2</sup> spiccolroaz@unibz.it

<sup>3</sup> gstradiotti@unibz.it

<sup>4</sup> gpisaturo@unibz.it

<sup>5</sup> mrighetti@unibz.it

\* Correspondence: mtavelli@unibz.it

† These authors contributed equally to this work.

The present Supplementary Materials include:

- the numerical results for the lid-driven cavity test with erodible bed obtained using a coarser domain discretization (figure S1);
- two videos showing the vorticity field (video S1) and particle tracking (video S2) for the closest-packing arrangement. In particular, video S1 shows the evolution of the vorticity magnitude in the time interval  $t \in [10, 15]$ , while video S2 shows the time evolution of particle paths in the time range  $t \in [10, 15]$ . The numerical solution for the velocity and pressure field is taken every  $dt = 0.1s$ , and the particles are released every  $dt_p = 0.01s$ , from 10 equidistant points taken on the vertical line  $x = 0.05$ ,  $y \in [0.03, 0.037]$ . The videos are provided as separate files.

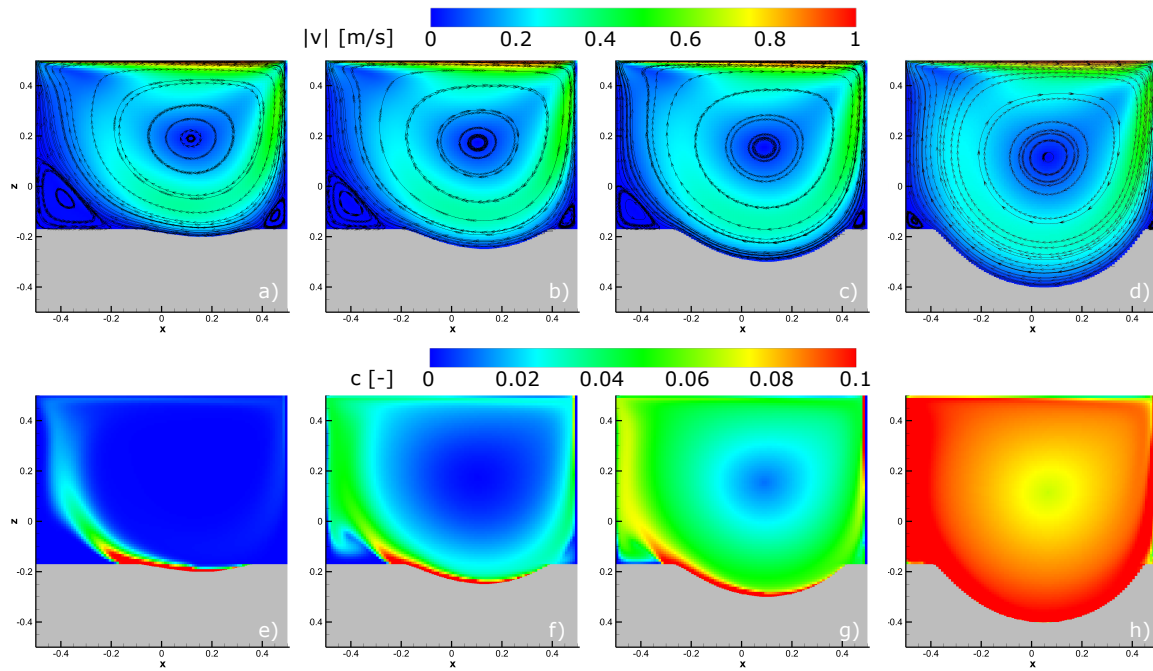

**Figure S1.** a)-d) Evolution of the streamlines in the cavity with the erodible bed at times  $t = 20, 50, 100, 300$  coloured using velocity magnitude; and e)-h) volume concentration of suspended sediment. The figure is the same as figure 6 in the main text, but for coarser (i.e.,  $100 \times 100$ ) resolution (10 000 elements having horizontal and vertical dimension of  $\Delta x = 1e - 2$  m and  $\Delta z = 1e - 2$  m). Results are coherent with those obtained using a finer computational grid ( $400 \times 400$ ; see figure 6 in the main text), although using the  $400 \times 400$  grid, we clearly see a higher level of detail and lower numerical diffusion.

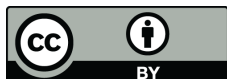

Supplement: s1 [file s1]
